# Supplementary material for: First investigation of the morphological and luminescence properties of HfO2 nanoparticles synthesized by photochemical synthesis
Source: Royal Society of Chemistry journal article supplement (doi:10.1039/d3ce00320e), 2023-01-01
Supplement: d3ce00320e1.pdf [file d3ce00320e1.pdf]

## CCs.

Irene Villa <sup>a ±\*</sup>, Lenka Prouzová Procházková <sup>a, b</sup>, Eva Mihóková <sup>a</sup>, Vladimír Babin <sup>a</sup>, Robert Král <sup>a</sup>, Petra Zemenová <sup>a</sup>, Alexandra Falvey <sup>a</sup>, Václav Čuba <sup>b</sup>, Matteo Salomoni <sup>c, d</sup>, Fiammetta Pagano <sup>c, d</sup>, Roberto Calà <sup>c, d</sup>, Isabel Frank <sup>c, e</sup>, Etiennette Auffray <sup>c</sup>, and M. Nikl <sup>a</sup>

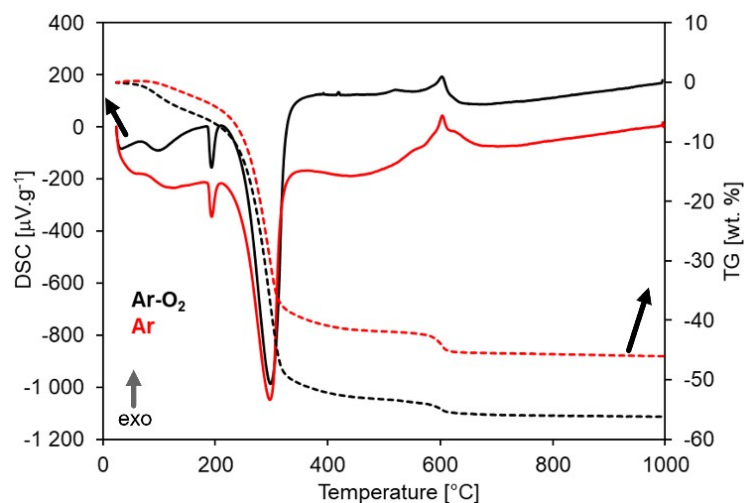

Fig S1 - DSC-TG curves (solid lines and dotted lines, respectively) of untreated HfO<sub>2</sub> under Ar (red lines) and Ar-20mol%O<sub>2</sub> (black lines) atmosphere.

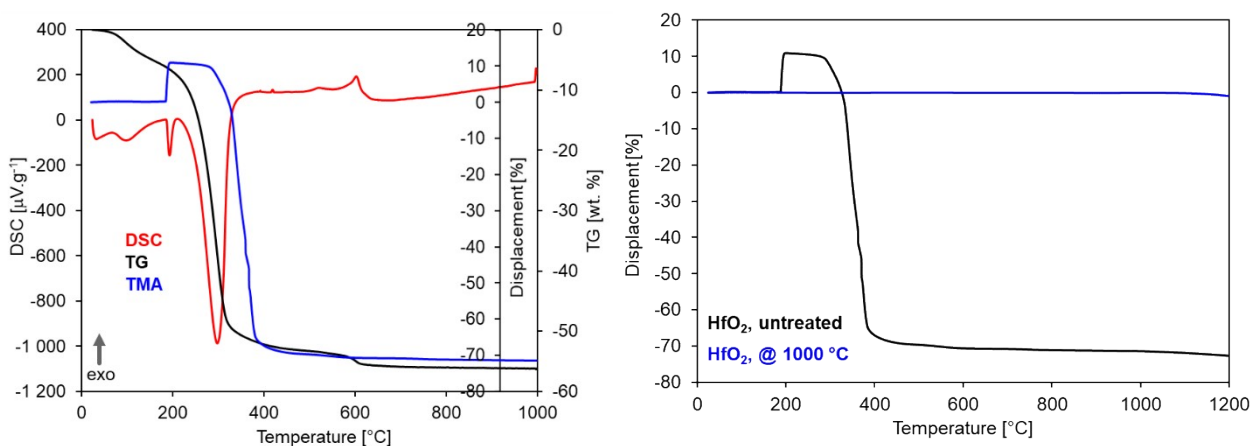

Fig S2 – DSC-TGA-TMA curves of HfO<sub>2</sub> untreated samples (left) and TMA curves of HfO<sub>2</sub> untreated and HfO<sub>2</sub> annealed at 1000 °C (right).

| MS (amu) | Fragment            | T <sub>onset</sub> (°C)          |
|----------|---------------------|----------------------------------|
| 15       | CH <sub>3</sub>     | 134, 271, 385, 535               |
| 17       | OH, NH <sub>3</sub> | 54, 151, 256, 372, 538, 574      |
| 18       | H <sub>2</sub> O    | 53, 184, 240, 356, 465, 537, 586 |
| 28       | N <sub>2</sub> , CO | 158, 413                         |
| 30       | NO                  | 110, 231, 289, 363, 461, 538     |
| 32       | O <sub>2</sub>      | 35, 144, 409                     |
| 44       | CO <sub>2</sub>     | 77, 151, 211, 314, 408, 568      |
| 45       | HCOO <sup>-</sup>   | 172, 303, 410, 571               |
| 46       | NO <sub>2</sub>     | 30, 131, 237, 303, 368, 521, 577 |

Table S1 – Summary of fragments detected by MS at displayed onset temperatures accompanying DSC-TGA effects.

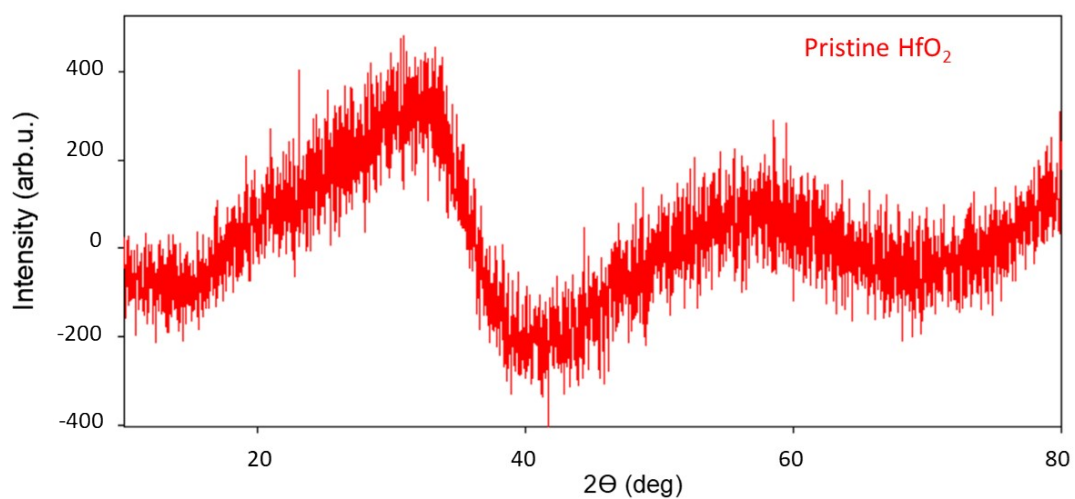

Fig S3 – XRD analysis performed on untreated solid product after photo-induced synthesis suggesting amorphous nature of NPs.

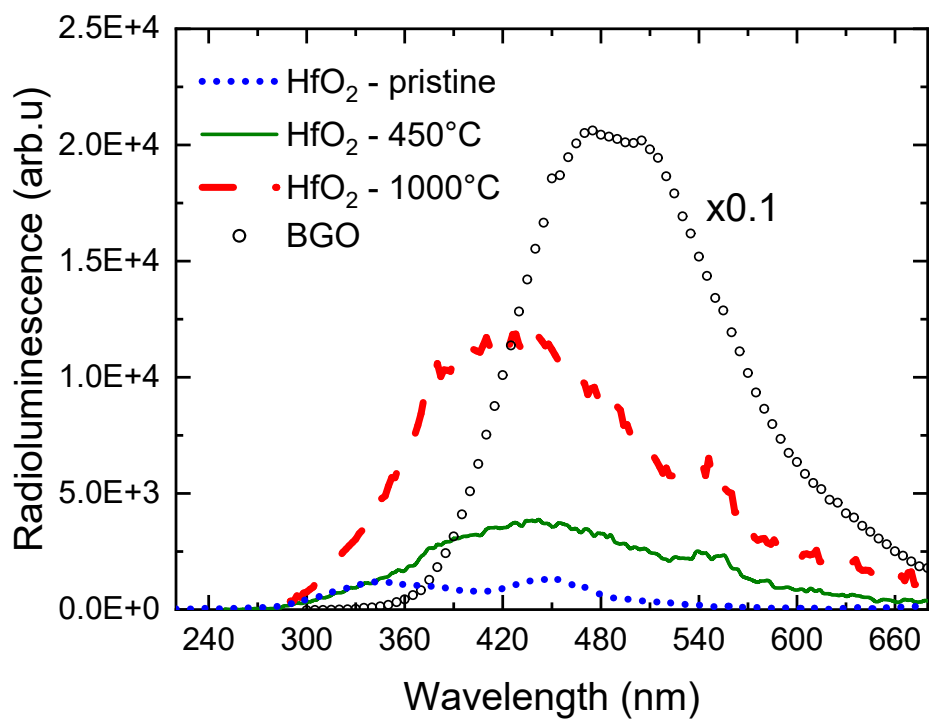

Fig S4– RL at RT of pristine HfO<sub>2</sub> NPs, NPs annealed at 450 °C (amorphous- blue small dots and the green line respectively) and HfO<sub>2</sub> annealed at 1000 °C (crystalline-red dotted line) in comparison with the powder of standard BGO - Bi<sub>4</sub>Ge<sub>3</sub>O<sub>12</sub> scintillator (black empty dots). RL of BGO has been acquired with reduced slit of ¼ with respect to the case of HfO<sub>2</sub> NPs and RL amplitude and the light output has been divided by a

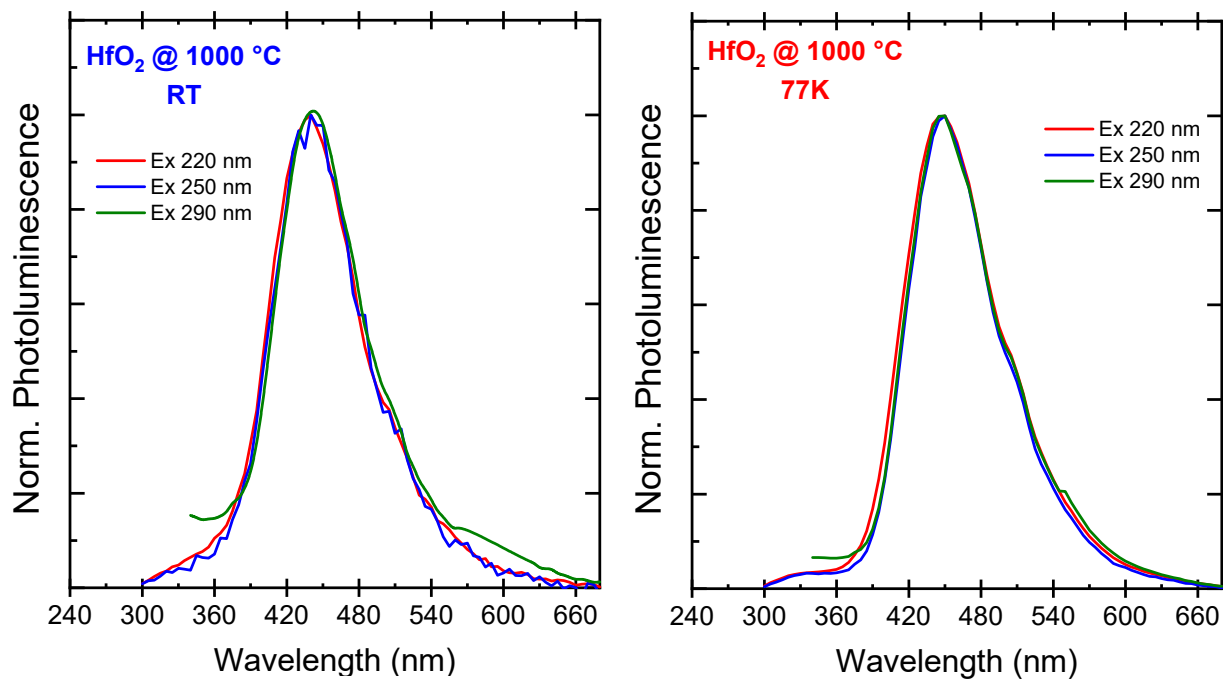

Fig S5 – PL under diverse excitation wavelengths for NPs annealed at 1000 °C at room temperature (left)

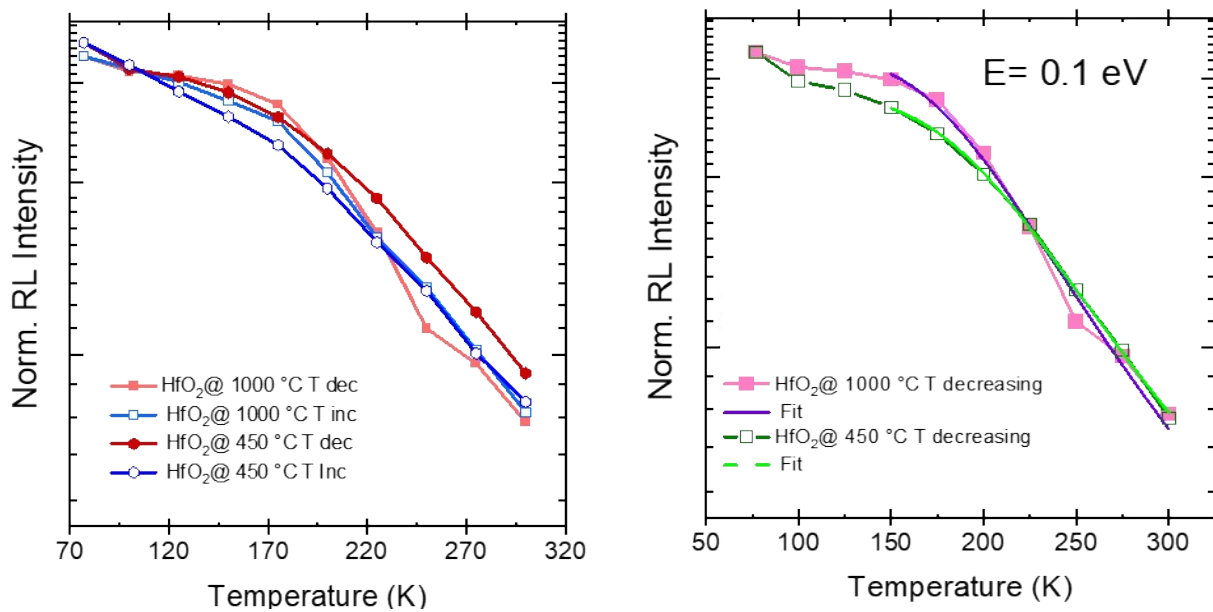

Fig. S6. - Normalized RL intensity as a function of temperature of NPs annealed at 450 °C and 1000 °C (integration of the RL spectra within 400-600 nm). RL spectra of HfO<sub>2</sub> NPs have been recorded by decreasing (T- dec) and increasing (T – inc) the temperature (left). RL intensity on the same NPs (light green and pink lines with markers) together with fit curves obtained from equation eqn(1) from 150 K to 300 K (dark green and violet lines) (right).

where

$k_b$  is the Boltzmann's constant.

$\alpha$  is a constant parameter.

$I_0$  is the luminescence intensity at 77K (here).

| eqn (1)  | $I(T) = I_0 / (1 + \alpha \exp(-E/(k_b T)))$        |
|----------|-----------------------------------------------------|
| $\alpha$ | (450°C) $130 \pm 15$<br>(1000°C) $160 \pm 16$       |
| E        | (450°C) $0.10 \pm 0.01$<br>(1000°C) $0.10 \pm 0.01$ |

Table S2 -Thermal quenching parameters  $\alpha$  and E of the RL intensities in HfO<sub>2</sub> annealed at 450 °C and 1000°C, obtained by numerical fits of the experimental data with eqn (1)

#### TRPL data analysis.

The time resolved PL and scintillation spectra reported in Figure 6 show a complex behavior. The signal decay has been reproduced with an analytical multi-exponential function:

$$I_{PL/Scint}(t) \propto y_0 + \sum_i A_i e^{-\left(\frac{t}{\tau_i}\right)} \quad \text{Eq. S1}$$

$y_0$  parameter has been added to consider the instrumental background and the contribution of any additional slower components.

The parameters used for the fitting procedure are reported in Table 2. The emission lifetime  $\tau_{avg}$  has been calculated as the weighted average of the characteristic decay time for each i-exponential function using:

$$\tau_{avg} = \frac{\sum_i A_i \tau_i}{\sum_i A_i} \quad \text{Eq. S2}$$

|                                  | $A_1,$<br>$\tau_1$                        | $A_2,$<br>$\tau_2$                        | $A_3,$<br>$\tau_3$                       | $y_0$ |
|----------------------------------|-------------------------------------------|-------------------------------------------|------------------------------------------|-------|
| TR-PL HfO <sub>2</sub> @ 1000°C  | $1440 \pm 220,$<br>$1.5 \pm 0.2\text{ns}$ | $280 \pm 30,$<br>$2.7 \pm 0.3 \text{ ns}$ | $12 \pm 1.8,$<br>$90 \pm 15 \text{ ns}$  | 9.0   |
| Scint. HfO <sub>2</sub> @ 1000°C | $113 \pm 20,$<br>$0.2 \pm 0.01\text{ns}$  | $15 \pm 2,$<br>$3.2 \pm 0.4 \text{ ns}$   | $4.0 \pm 0.6,$<br>$60 \pm 10 \text{ ns}$ | 9.0   |

Table S3 -Results of the fit analyses performed on the experimental data of TR-PL and scintillation decay.
